# Supplementary material for: Exosomal EPHA2 derived from highly metastatic breast cancer cells promotes angiogenesis by activating the AMPK signaling pathway through Ephrin A1-EPHA2 forward signaling
Source: PubMed Central journal article supplement (PMC9169374; doi:10.7150/thno.72404), 2022-05-13
Supplement: thnov12p4127s1.pdf [file thnov12p4127s1.pdf]

# Supplementary Materials

## Supplementary Methods

### HIF-1 $\alpha$ knockdown or Inhibition

HIF-1 $\alpha$  siRNAs were obtained from GenePharma (163971 and 163972, Suzhou China). The HIF-1 $\alpha$  antibody was obtained from Abcam (51608, Cambridge, USA). The HIF-1 $\alpha$  inhibitor 3-(5'-hydroxymethyl-2'-furyl)-1-benzylindazole (YC-1) was obtained from MedChem Express (Princeton, NJ, USA). Transfections were performed using Lipofectamine™ RNAiMAX Transfection Reagent (ThermoFisher, 13778150) according to the manufacturer's instructions. After 48 h of transfection, cells were then treated with the indicated exosomes and HUVECs were further analyzed for their tube-forming ability.

### RNA sequencing and Bioinformatics

#### Sample collection and preparation

#### RNA quantification and qualification

RNA integrity was analyzed using the RNA Nano 6000 Assay Kit of the Bioanalyzer 2100 system (Agilent Technologies, CA, USA).

#### Library preparation

Total RNA was extracted using Trizol (ThermoFisher, USA, Cat no.: 710369) as input for the RNA isolation. Briefly, mRNA was purified from total RNA using poly-T oligo-conjugated magnetic beads. The enriched mRNAs were fragmented using divalent cations under elevated temperature in the First Strand Synthesis Reaction Buffer(5X). First strand cDNA was synthesized using random hexamer primers and

23 M-MuLV Reverse Transcriptase, followed by RNA degradation using RNaseH  
24 Second strand cDNA synthesis was subsequently performed using DNA Polymerase I  
25 and dNTPs. The remaining overhangs were converted into blunt ends via  
26 exonuclease/polymerase activities. After adenylation of 3' ends of DNA fragments,  
27 Adapters with hairpin loop structures were ligated to prepare for hybridization. In  
28 order to select cDNA fragments of preferentially 370~420 bp in length, the library  
29 fragments were purified using the AMPure XP system (Beckman Coulter, Beverly,  
30 USA). Then PCR was performed with Phusion High-Fidelity DNA polymerase,  
31 Universal PCR primers and Index (X) Primer. At last, PCR products were purified  
32 (AMPure XP system) and library quality was assessed on the Agilent Bioanalyzer  
33 2100 system.

#### 34 **Clustering and sequencing**

35 The clustering of the index-coded samples was performed on a cBot Cluster  
36 Generation System using TruSeq PE Cluster Kit v3-cBot-HS (Illumina) according to  
37 the manufacturer's instructions. Then library preparations were sequenced on an  
38 Illumina Novaseq platform and 150 bp paired-end reads were generated.

#### 39 **Data Analysis**

##### 40 **Quality control**

41 Raw data (raw reads) of fastq format were firstly processed to obtain clean data (clean  
42 reads) by removing reads containing adapter, reads containing N base and low quality  
43 reads. In this step, the Q20, Q30 and GC content the clean data were calculated. The  
44 clean data were used in downstream data analysis.

45 **Reads mapping and Quantification**

46 Reference genome (hg38) and gene model annotation files were downloaded directly  
47 from the genome website . Indexing and paired-end clean reads alignment was  
48 performed using Hisat2 v2.0.5. FeatureCounts v1.5.0-p3 was used to count the reads  
49 numbers mapped to each transcripts, and the FPKM of each gene was calculated.

50 **Differential expression analysis**

51 Differential expression analysis of two conditions/groups (three biological replicates  
52 per condition) was performed using the DESeq2 R package (1.20.0). The P-values  
53 were adjusted using the Benjamini and Hochberg's approach for controlling the false  
54 discovery rate. Genes with adjusted P-values <0.05 found by DESeq2 were assigned  
55 as differentially expressed.

56 **Enrichment analysis of differentially expressed genes**

57 Gene Ontology (GO) enrichment analysis of differentially expressed genes was  
58 implemented by the clusterProfiler R package, in which gene length bias was  
59 corrected. GO terms with corrected P-value less than 0.05 were considered  
60 significantly enriched by differential expressed genes.

61

62

63

64

65

66

67

68 **Supplementary Figures**

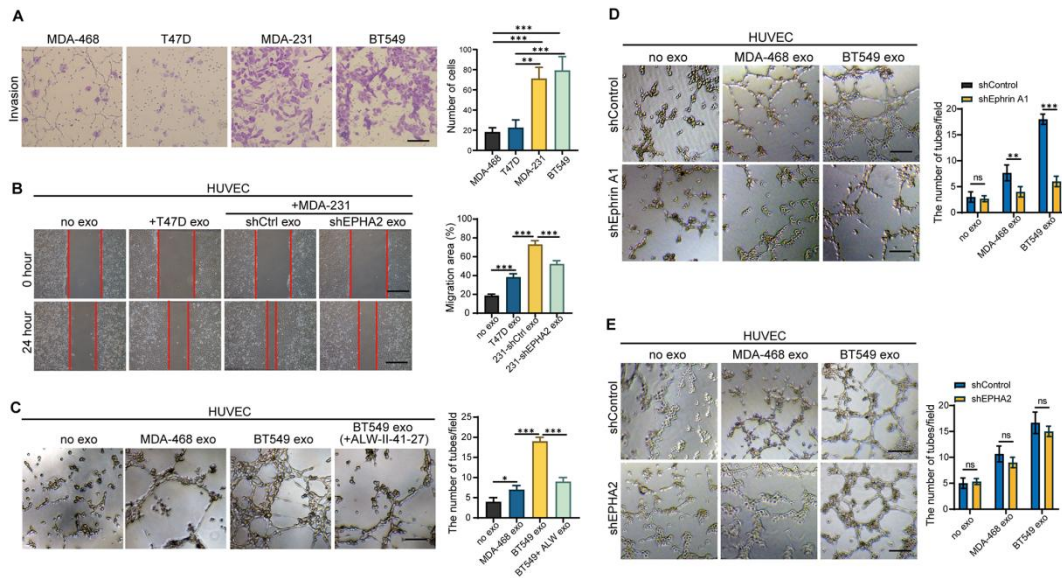

69

70 **Figure S1**

71 **A** The invasion ability of breast cancer cells with high metastatic potential (MDA-231  
 72 or BT-549) was significantly higher than that of breast cancer cells with low  
 73 metastatic potential (MDA-468 or T47D). For cell invasion assay,  $1 \times 10^5$  cells  
 74 suspended in 200  $\mu$ L of serum-free medium were loaded onto the upper chambers  
 75 coated with Matrigel. The incubation time was 24 h. The statistical results were  
 76 summarized in the right panel. **B** EPHA2-silenced HM-exos failed to promote the  
 77 migration of endothelial cells. **C** The inhibitor-treated HM-Exos could not promote  
 78 the tube formation of endothelial cells. **D** HM-Exos failed to promote the  
 79 tube-forming ability of Ephrin A1-KD endothelial cells. **E** HM-Exos still promote the  
 80 tube-forming ability of EPHA2-KD endothelial cells. Data were expressed as  
 81 mean  $\pm$  SD. All experiments were repeated at least three times. \*P < 0.05, \*\*P < 0.01,  
 82 \*\*\*P < 0.001 and ns P > 0.05 indicate no statistical significance. Scale bar: 200  $\mu$ m.

83

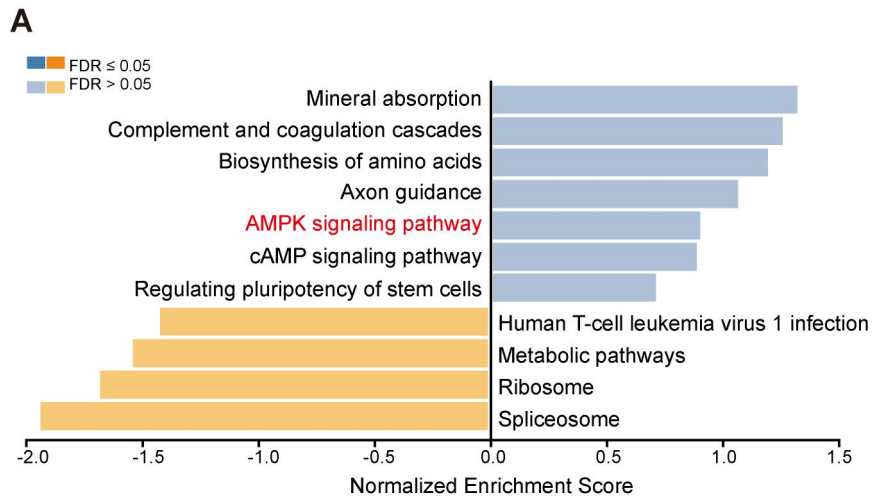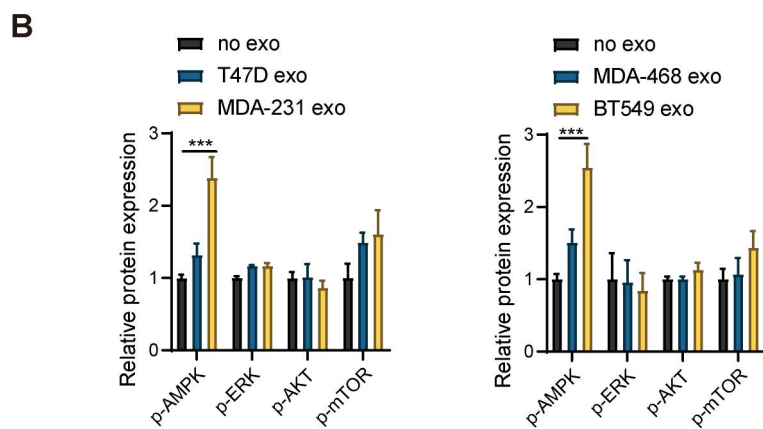

84

85 **Figure S2**

86 **A** Gene set enrichment analysis (GSEA) of the RNA-Seq data showed that the AMPK  
 87 signaling pathway was induced in EPHA2-rich exosomes treated HUVECs compared  
 88 with control exosome treated cells. FDR, False Discovery Rate. **B** Quantification of  
 89 the western blotting images in Figure 5B. The analysis was performed using WB scans  
 90 from three biological repeats.

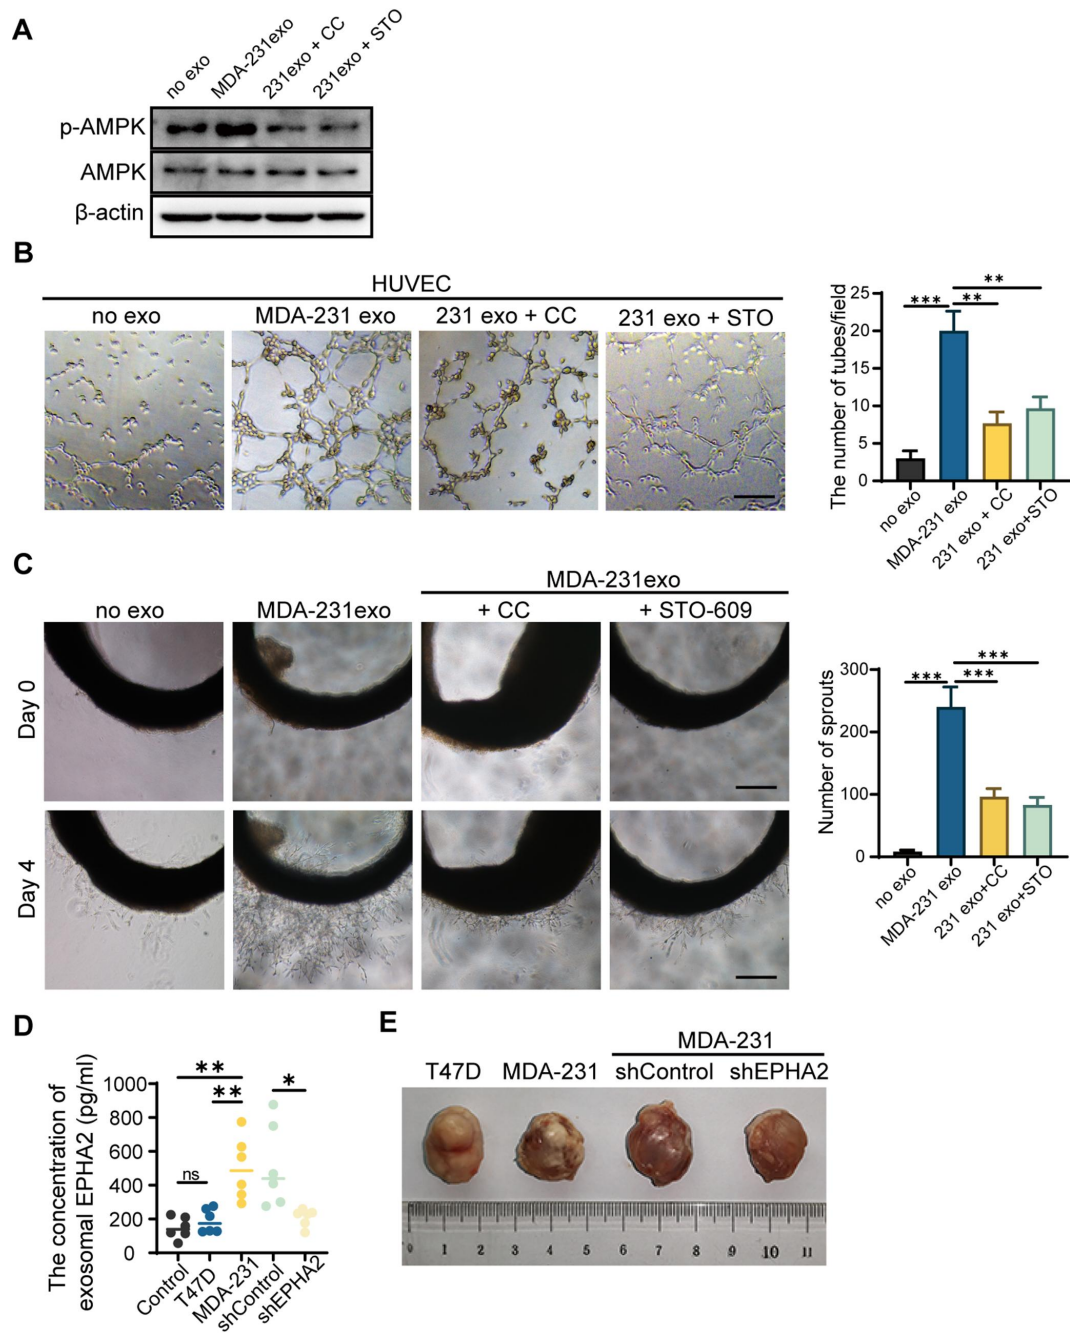

91

92 **Figure S3**

93 **A** Compound C or STO609 eliminated the phosphorylation of AMPK in HUVEC that

94 incubated with HM-Exos. **B, C** Inhibition of AMPK signaling by Compound C or

95 STO609 reduced the tube-forming and rat arterial ring outgrowth capacity in

96 HM-Exos treated endothelial cells. **D** Exosomal EPHA2 was significantly upregulated

97 in plasma of mice from the MDA-231 and MDA-231-shControl groups compared

98 with the T47D and MDA-231-shEPHA2 groups. **E** Representative images of  
99 subcutaneous tumor formed in mice. All experiments were repeated at least three  
100 times. \*P < 0.05, \*\*P < 0.01, \*\*\*P < 0.001 and ns P > 0.05 indicate no statistical  
101 significance. Scale bar: 200  $\mu$ m.  
102

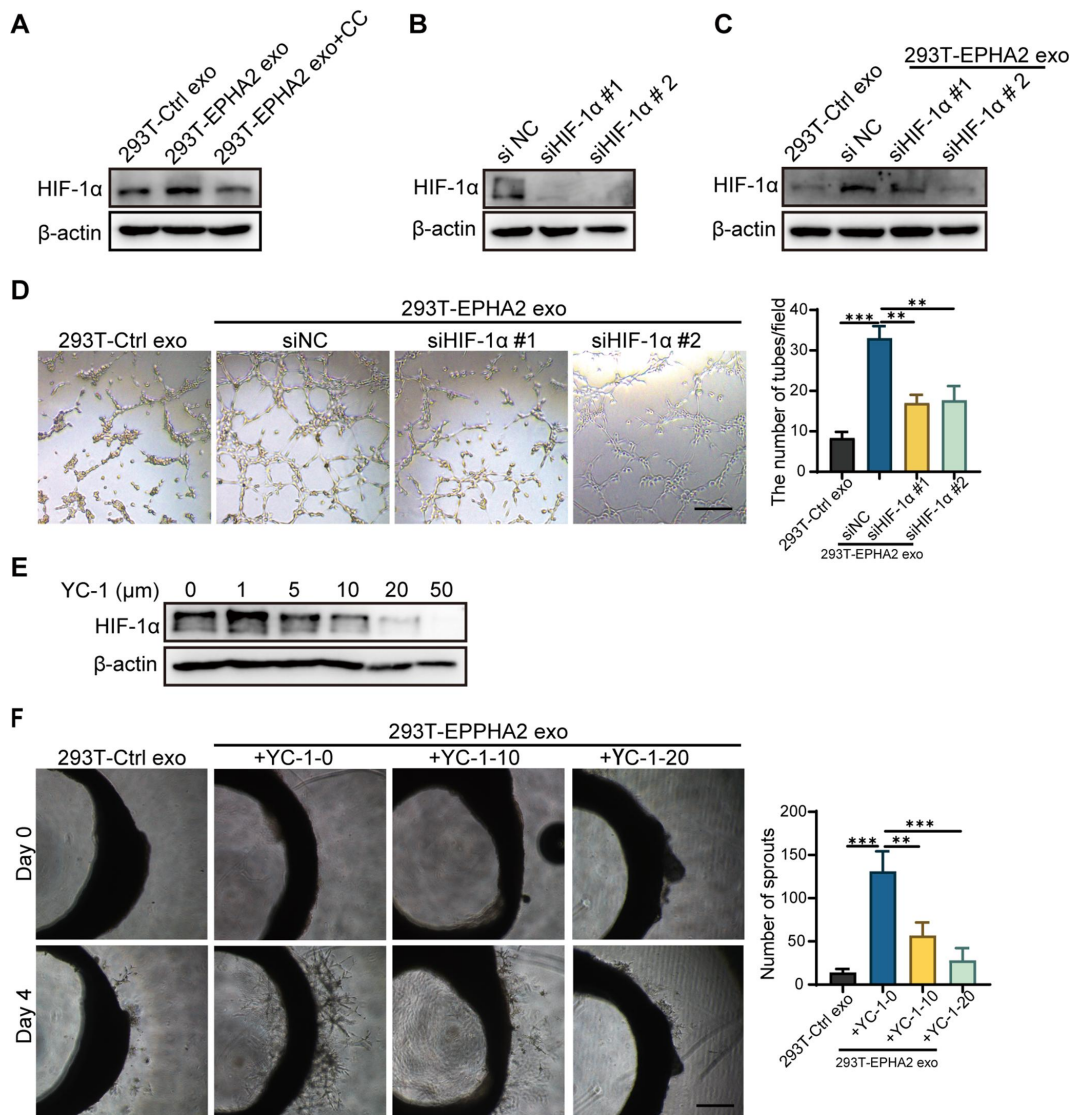

103

104 **Figure S4**

105 **A** EPHA2-rich exosomes increased HIF-1α protein levels in endothelial cells whereas  
 106 Compound C inhibited the upregulation of HIF-1α by EPHA2-rich exosomes. **B**  
 107 HIF-1α expression was silenced in endothelial cells. **C** EPHA2-rich exosomes failed  
 108 to increase the HIF-1α protein levels in HIF-1α-KD cells. **D** EPHA2-rich exosomes  
 109 failed to promote the tube-forming ability of HIF-1α-KD HUVECs. **E** YC-1 can  
 110 inhibit the protein expression level of HIF-1α in endothelial cells. **F** YC-1 reduced the  
 111 ability of microvessel growth in EPHA2-rich exosome-treated rat arterial rings.



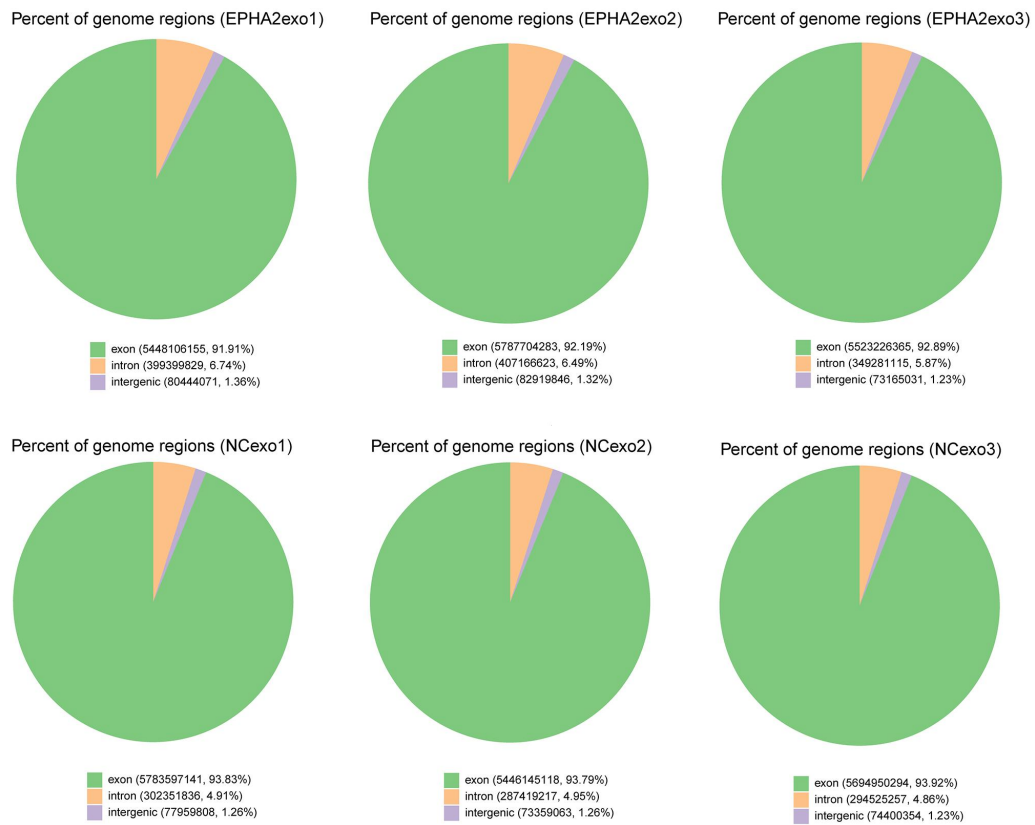

112

113 **Figure S5 The percentage of reads that mapped to the mRNA**

114 The percentage of reads that mapped to the mRNA. The mapping information of each

115 technical replicate was shown as pie plot.

116

117 **Supplementary Tables**

118

119 **Table S1. The shRNA sequences used in this study**

| Name           | Sequence                     |
|----------------|------------------------------|
| shEPHA2 #1     | 5'-CTATTCTGTCAGTGTTAAA-3'    |
| shEPHA2 #2     | 5'-GATAAGTTTCTATTCTGTCAG-3'  |
| shEphrin-A1 #1 | 5'-AGAGGTGCGG GTTCTACATAG-3' |
| shEphrin-A1 #2 | 5'-GTCTTCTGGAACAGTTCAAAT-3'  |

120

121

**Table S2. Primers used in this study**

| <b>Name</b>           | <b>Primers</b>                                      |
|-----------------------|-----------------------------------------------------|
| mCherry-F             | ACCTCCATAGAAGATTCTAGAGCCACCATGGTGAGCAAGG<br>GCGAGGA |
| mCherry-R             | TTCGAATTCGCTAGCTCTAGATTACTTGTACAGCTCGTCCA<br>TGCC   |
| EPHA2-F               | ACCTCCATAGAAGATTCTAGAGCCACCATGGAGCTCCAGG            |
| EPHA2-R               | TTCGAATTCGCTAGCTCTAGATTACTTGTACAGCTCGTCCA<br>TGCC   |
| EPHA2- $\Delta$ RBD-F | ACCTCCATAGAAGATTCTAGAGCCACCATGGGCCTGGC              |
| EPHA2- $\Delta$ RBD-R | TTCGAATTCGCTAGCTCTAGATTACTTGTACAGCTCGTCCA<br>TGCC   |
| EPHA2-S897A-F         | ACCTCCATAGAAGATTCTAGAGCCACCATGGAGCTCCAGG            |
| EPHA2-S897A-R         | TTCGAATTCGCTAGCTCTAGACTTACTTGTACAGCTCGTCC<br>ATGCC  |
| EPHA2-D739N-F1        | ACCTCCATAGAAGATTCTAGAGCCACCATGGAGCTCCAGG            |
| EPHA2-D739N-R1        | GGCAGCCAGATTACGGTGCACATAGTTCATGTTGGCC               |
| EPHA2-D739N-F2        | GTGCACCGTAATCTGGCTGCCCCGCAACATCCTCGTCAA             |
| EPHA2-D739N-R2        | TTCGAATTCGCTAGCTCTAGACTTACTTGTACAGCTCGTCC<br>ATGCC  |
| EPHA2-D739N-F3        | CTCCCCAGCACGAGCGGCTCGGAGGGGGTGCCCTCCGCA<br>C        |
| EPHA2-D739N-R3        | AGCCGCTCGTGCTGGGGAGCCGGATAGACACGC                   |

**Table S3. Summary of RNA-Seq data quality**

| <b>Sample</b> | <b>Raw reads</b> | <b>Clean reads</b> | <b>Clean bases</b> | <b>Error rate</b> | <b>Q20</b> | <b>GC %</b> |
|---------------|------------------|--------------------|--------------------|-------------------|------------|-------------|
| EphA2exo1     | 45324432         | 42280544           | 6.34G              | 0.03              | 97.59      | 49.37       |
| EphA2exo2     | 45356986         | 44599476           | 6.69G              | 0.03              | 97.85      | 48.95       |
| EphA2exo3     | 45116568         | 42306052           | 6.35G              | 0.03              | 97.5       | 49.46       |
| NCexo1        | 45727976         | 44177416           | 6.63G              | 0.03              | 97.72      | 50.57       |
| NCexo2        | 43439160         | 41605440           | 6.24G              | 0.03              | 97.44      | 50.4        |
| NCexo3        | 46196778         | 43249020           | 6.49G              | 0.03              | 97.51      | 50.31       |

**Table S4. Statistics of comparisons between samples and reference genome**

| Exported data |             |           |            |           |           |           |              |              |            |              |            |
|---------------|-------------|-----------|------------|-----------|-----------|-----------|--------------|--------------|------------|--------------|------------|
| sample        | total_reads | total_map | unique_map | multi_map | read1_map | read2_map | positive_map | negative_map | splice_map | unsplice_map | proper_map |
| Eph           | 422         | 396179    | 384543     | 11636     | 192592    | 191950    | 192068       | 192475       | 176254     | 208288       | 373046     |
| A2e           | 805         | 91(93.7   | 50(90.9    | 41(2.7    | 93(45.5   | 57(45.4   | 18(45.4      | 32(45.5      | 55(41.6    | 95(49.2      | 46(88.2    |
| xo1           | 44          | %)        | 5%)        | 5%)       | 5%)       | %)        | 3%)          | 2%)          | 9%)        | 6%)          | 3%)        |
| Eph           | 445         | 419291    | 407167     | 12123     | 204404    | 202762    | 203415       | 203752       | 185711     | 221455       | 397705     |
| A2e           | 994         | 06(94.0   | 34(91.2    | 72(2.7    | 95(45.8   | 39(45.4   | 04(45.6      | 30(45.6      | 38(41.6    | 96(49.6      | 16(89.1    |
| xo2           | 76          | 1%)       | 9%)        | 2%)       | 3%)       | 6%)       | 1%)          | 8%)          | 4%)        | 5%)          | 7%)        |
| Eph           | 423         | 397322    | 385796     | 11525     | 193295    | 192501    | 192721       | 193075       | 182136     | 203660       | 374649     |
| A2e           | 060         | 87(93.9   | 94(91.1    | 93(2.7    | 88(45.6   | 06(45.5   | 14(45.5      | 80(45.6      | 13(43.0    | 81(48.1      | 70(88.5    |
| xo3           | 52          | 2%)       | 9%)        | 2%)       | 9%)       | %)        | 5%)          | 4%)          | 5%)        | 4%)          | 6%)        |
|               | 441         | 411878    | 400588     | 11290     | 200917    | 199670    | 200102       | 200485       | 188159     | 212428       | 390010     |
| NCe           | 774         | 63(93.2   | 22(90.6    | 41(2.5    | 87(45.4   | 35(45.2   | 91(45.3      | 31(45.3      | 70(42.5    | 52(48.0      | 04(88.2    |
| xo1           | 16          | 3%)       | 8%)        | 6%)       | 8%)       | %)        | %)           | 8%)          | 9%)        | 9%)          | 8%)        |
|               | 416         | 387968    | 377383     | 10585     | 189223    | 188160    | 188498       | 188885       | 177835     | 199548       | 367153     |
| NCe           | 054         | 98(93.2   | 65(90.7    | 33(2.5    | 35(45.4   | 30(45.2   | 61(45.3      | 04(45.4      | 13(42.7    | 52(47.9      | 88(88.2    |
| xo2           | 40          | 5%)       | 1%)        | 4%)       | 8%)       | 2%)       | 1%)          | %)           | 4%)        | 6%)          | 5%)        |
|               | 432         | 405239    | 393721     | 11517     | 197188    | 196532    | 196670       | 197051       | 187323     | 206397       | 382356     |
| NCe           | 490         | 61(93.7   | 62(91.0    | 99(2.6    | 81(45.5   | 81(45.4   | 03(45.4      | 59(45.5      | 94(43.3    | 68(47.7      | 66(88.4    |
| xo3           | 20          | %)        | 4%)        | 6%)       | 9%)       | 4%)       | 7%)          | 6%)          | 1%)        | 2%)          | 1%)        |
